# Supplementary material
Source: MDPI journal article supplement (https://www.mdpi.com/2072-4292/13/21/4409)
Supplement: s1 [file s1]

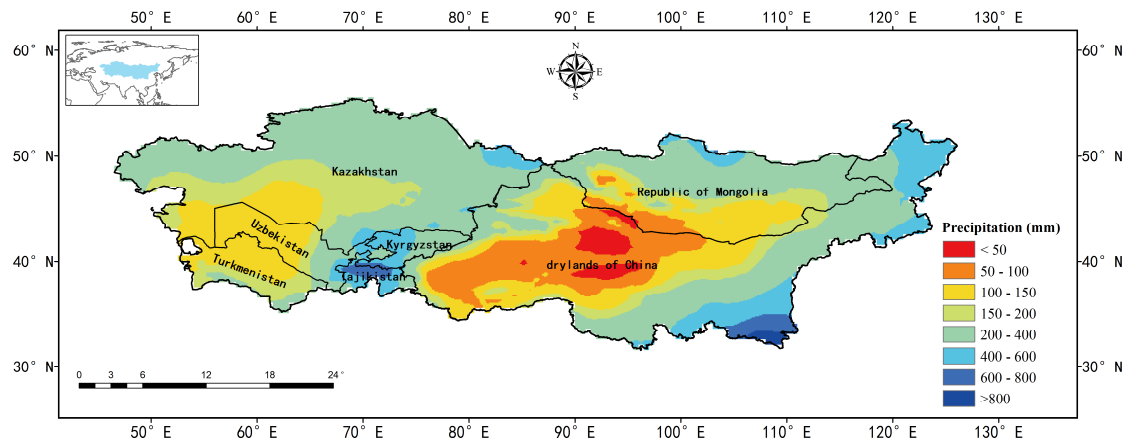

**Figure S1.** Spatial distribution of annual total precipitation (1960-2019) precipitation (Data from CRU 4.04)

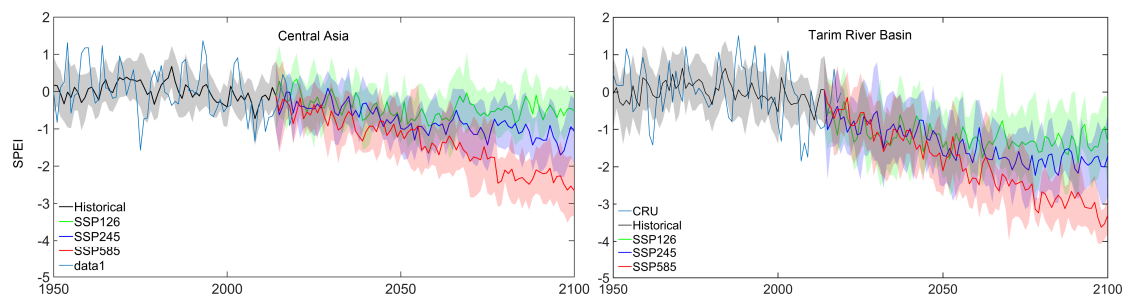

**Figure S2.** Changes of the SPEI in the Central Asia and Tarim River Basin

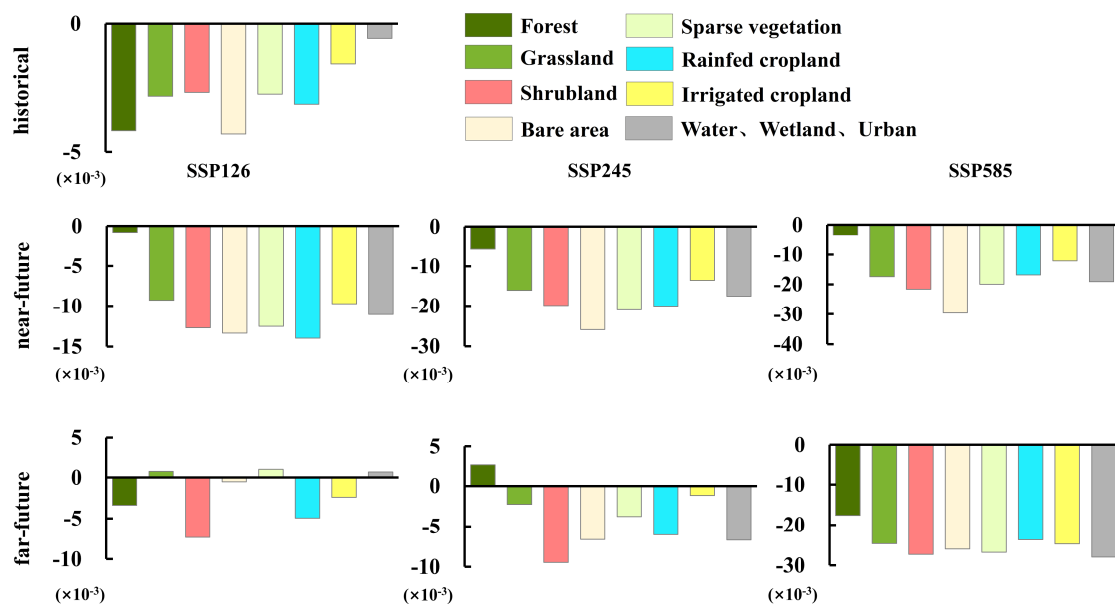

**Figure S3.** Sen's slope for different land cover types for three periods: historical (1960-2014), near future (2021-2060), far future (2061-2100). The land cover data selected from the most frequently occurring land cover types during 1992-2015 (data from European Space Agency)

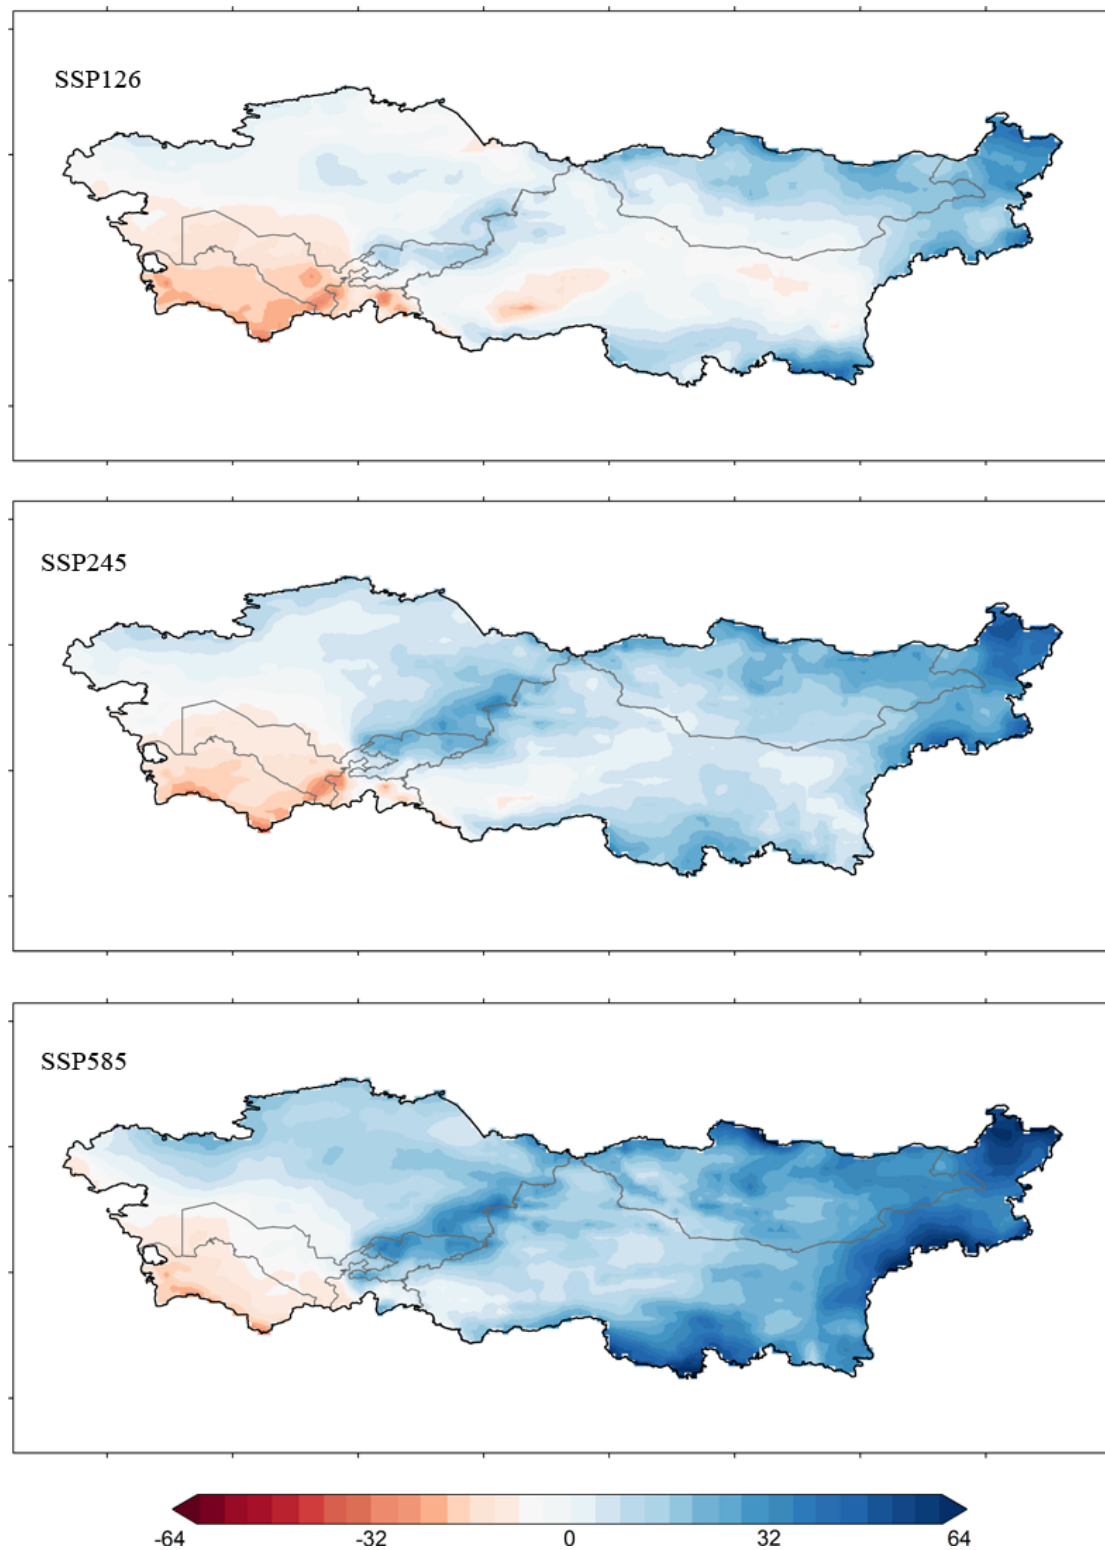

**Figure S4.** Spatial distribution of annual precipitation anomalies for the period 2061–2100. Relative anomalies were computed with respect to the historical period 1960–2014.
